# Supplementary material for: Inhibition of NF-κB/IL-33/ST2 Axis Ameliorates Acute Bronchiolitis Induced by Respiratory Syncytial Virus
Source: Hindawi journal article supplement (doi:10.1155/2021/6625551), 2021-08-04

wb original data

Figure 2A

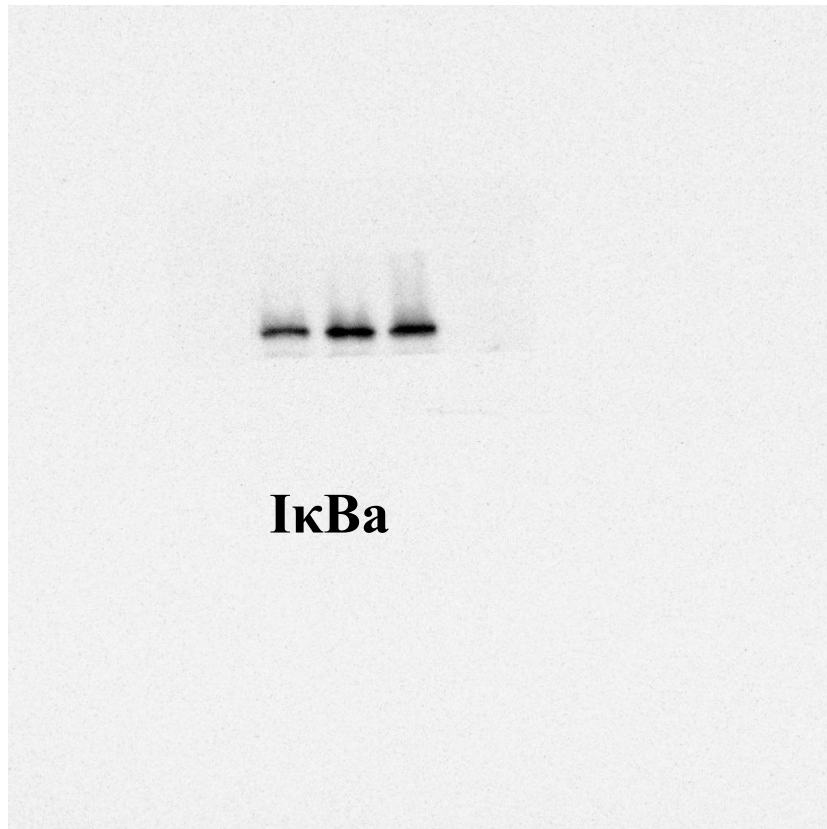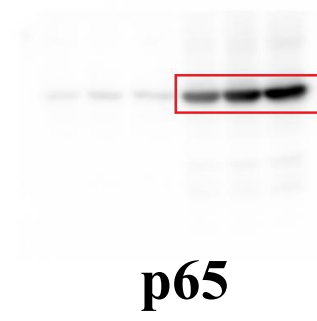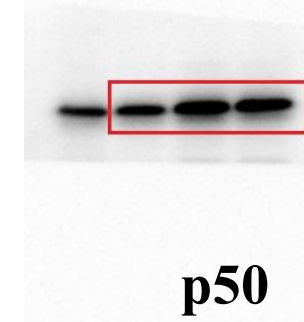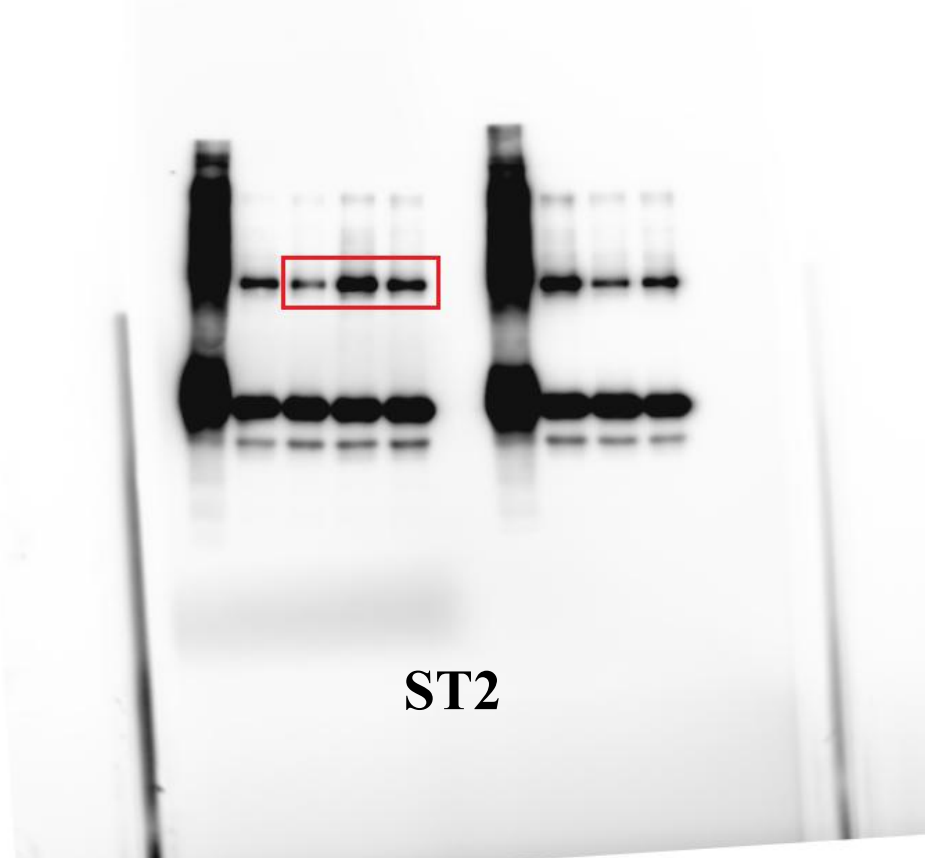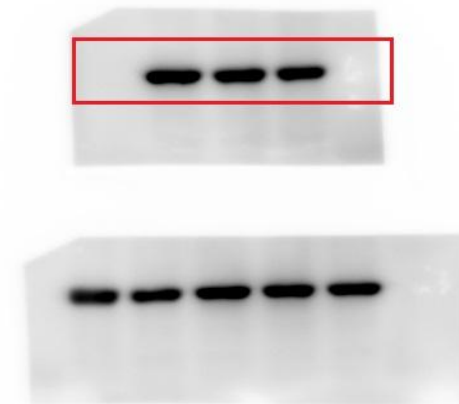

**wb original data**

**Figure 2E**

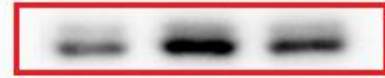

**ST2**

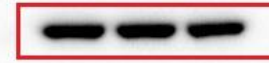

**GAPDH**

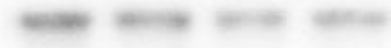

wb original data

Figure 5B

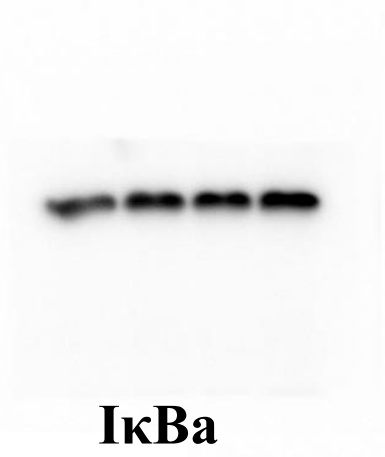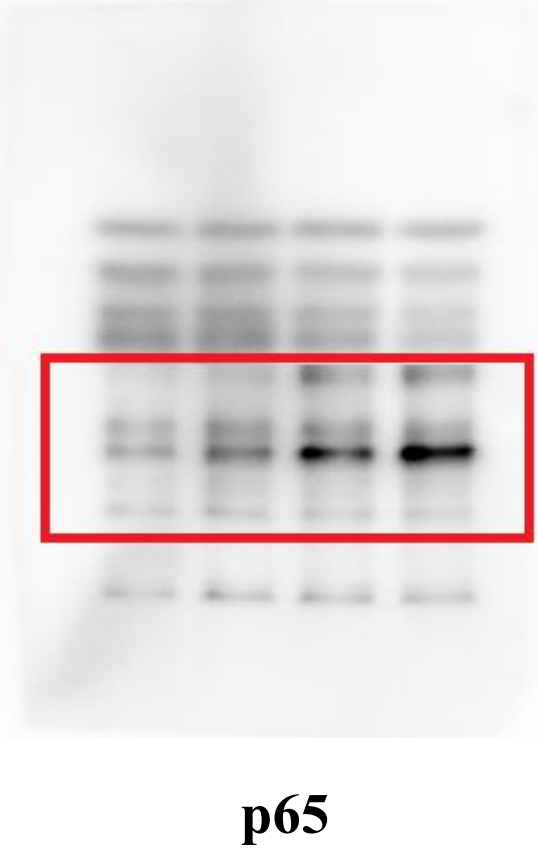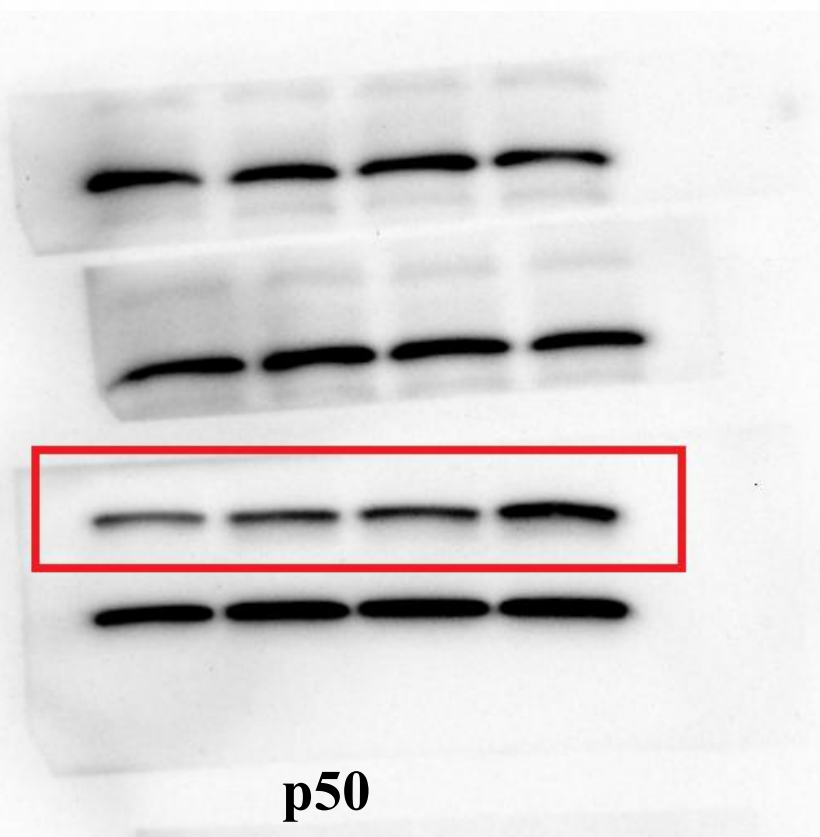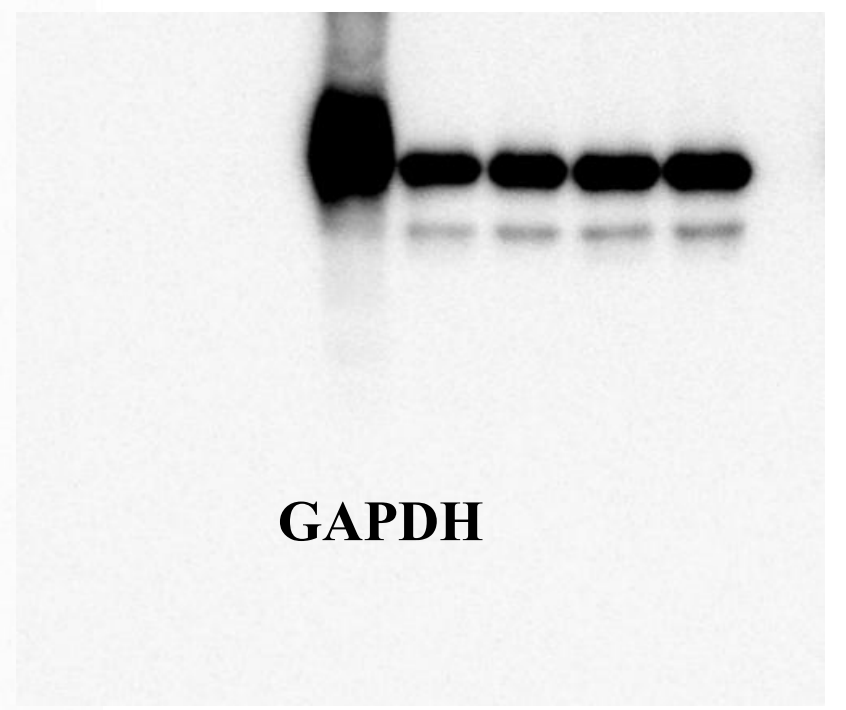

Supplement: f1 [file 6625551.f1.pdf]
